# Supplementary material for: Synergistic regulation of cerebellar Purkinje neuron development by laminin epitopes and collagen on an artificial hybrid matrix construct
Source: Royal Society of Chemistry journal article supplement (doi:10.1039/c3bm60228a), 2014-01-01
Supplement: c3bm60228a1.pdf [file c3bm60228a1.pdf]

## Supporting Information

### Control of cerebellar Purkinje cell development by synergistic activity of collagen and laminin-1

Shantanu Sur, Mustafa O. Guler, Matthew J. Webber, Eugene T. Pashuck, Masao Ito, Samuel I. Stupp, Thomas Launey

#### Supplementary figures

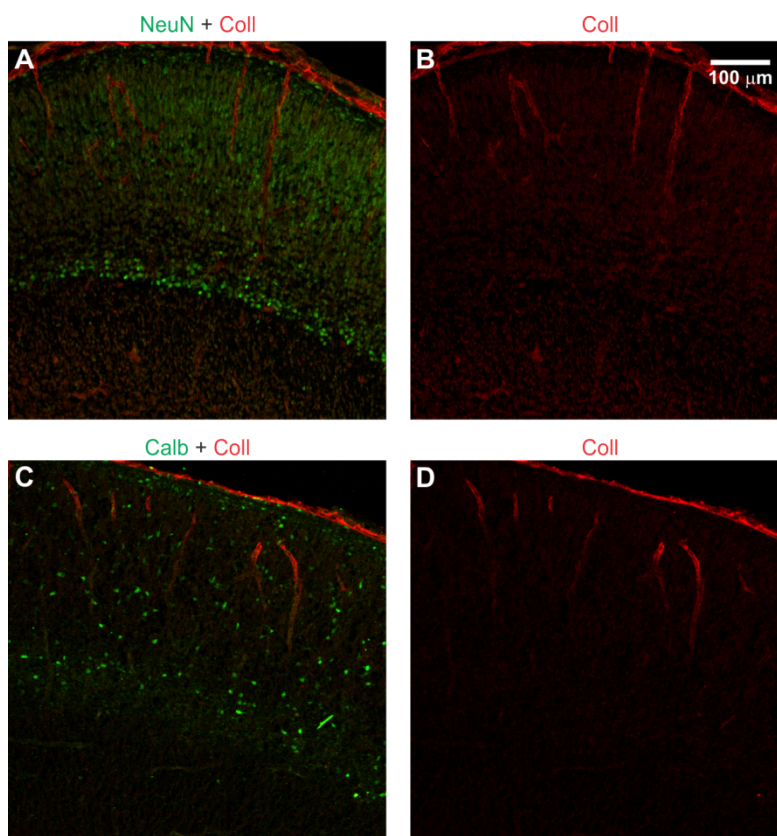

Fig. S1: Collagen expression in rat cerebral cortex. Sagittal sections of cerebral cortex from 20 days old rat embryo, stained for collagen type I-V (red) and co-immunostained for neuronal specific nuclear protein NeuN (**A**) or calbindin (**C**). The collagen channel alone is shown in (**B**) and (**D**).

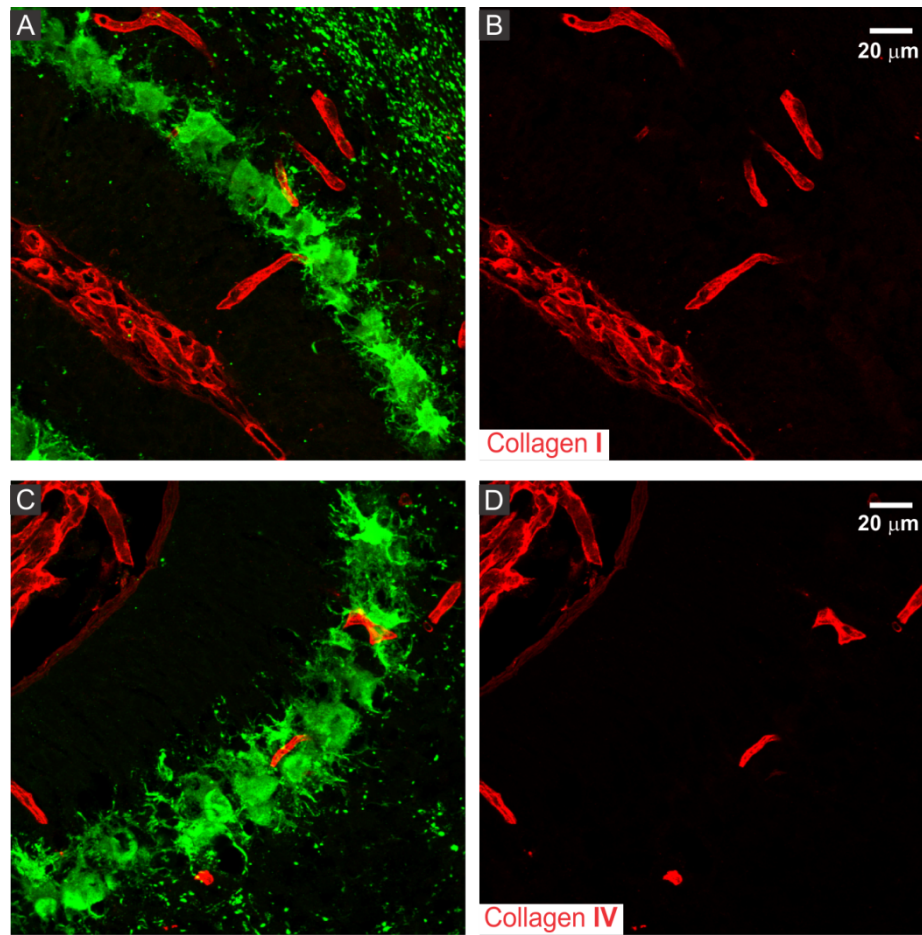

Fig. S2: Expression of Collagen I and Collagen IV in rat cerebellar cortex. Sagittal sections of postnatal 5 days old cerebellum stained for calbindin (green) and co-immunostained for either collagen type I (*A*) or collagen type IV (*C*). The collagen channel alone is shown in (*B*) and (*D*).

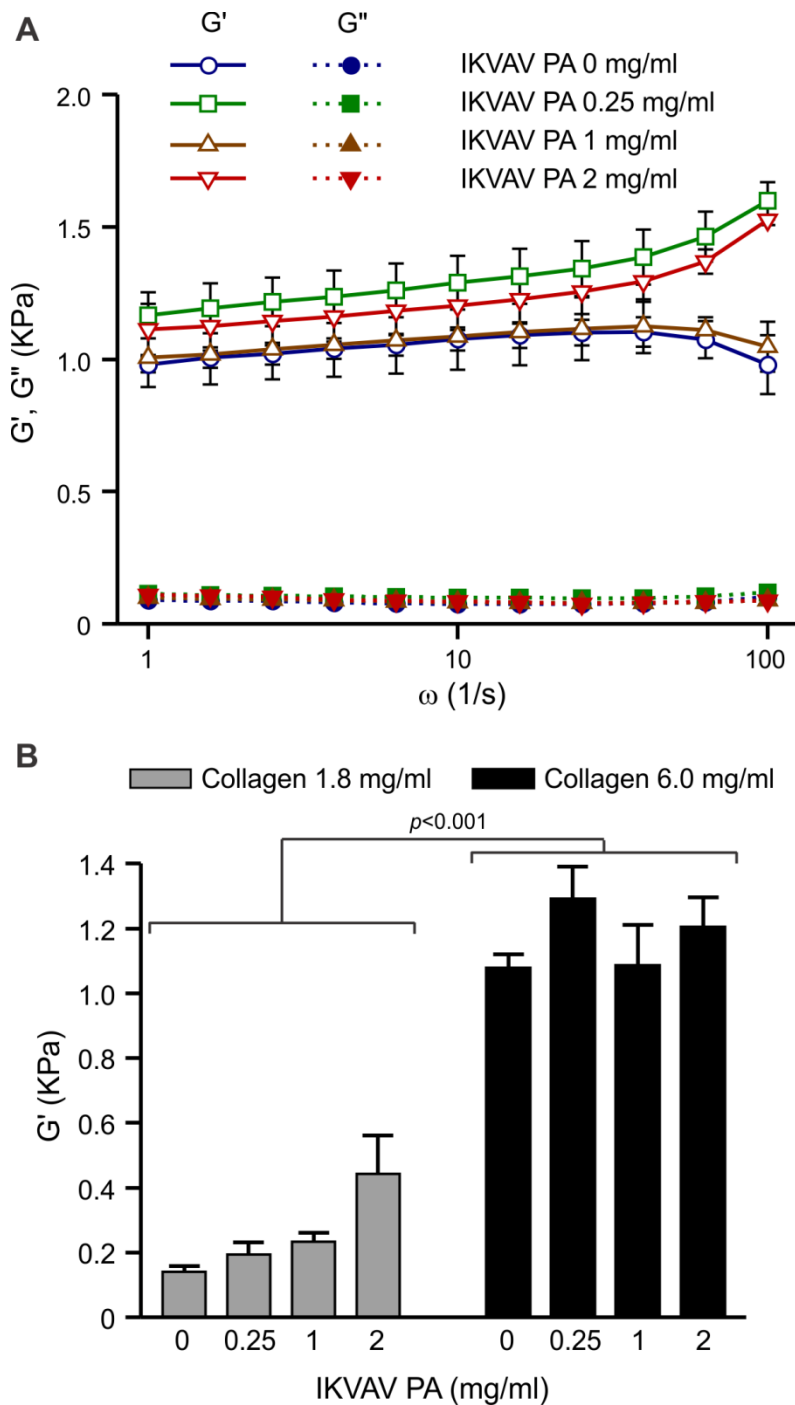

Fig. S3: (**A**) Rheological measurements (storage modulus,  $G'$ ; loss modulus  $G''$ ) of hybrid matrices formed by collagen 6.0 mg/ml and different IKVAV PA concentrations over an angular frequency range of 1 to 100 s<sup>-1</sup> (strain 0.1%; each trace represents an average of three measurements). (**B**) Effects of collagen and IKVAV PA concentrations on the storage moduli of hybrid matrices, compared at an angular frequency of 10 s<sup>-1</sup> and strain of 0.1% (two-way ANOVA with Tukey's post-hoc comparison; n=3).
